# Supplementary material for: The importance of raw graphite size to the capacitive properties of graphene oxide
Source: Royal Society of Chemistry journal article supplement (doi:10.1039/c5ra24501j), 2016-01-01
Supplement: c5ra24501j1.pdf [file c5ra24501j1.pdf]

## **The importance of raw graphite size to the capacitive properties of graphene oxides**

Haoran Yu<sup>a</sup>, Keyu Xie<sup>a,\*</sup>, Jingzhi Hu<sup>a</sup>, Chao Shen<sup>a</sup>, Jian-gan Wang<sup>a</sup>, Bingqing

Wei<sup>a,b,\*</sup>

*<sup>a</sup> State Key Laboratory of Solidification Processing and Center for Nano Energy*

*Materials, Northwestern Polytechnical University, Xi'an, 710072, China*

*<sup>b</sup> Department of Mechanical Engineering, University of Delaware, Newark, DE 19716,*

*USA*

\*Corresponding author.

E-mail address: [kyxie@nwpu.edu.cn](mailto:kyxie@nwpu.edu.cn) (K.Y. Xie); [weib@udel.edu](mailto:weib@udel.edu) (B.Q. Wei)

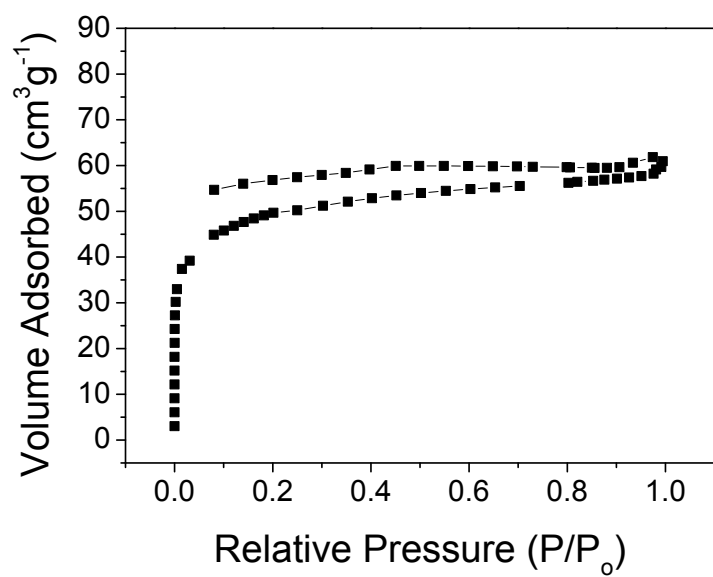

Fig. S1 Nitrogen adsorption-desorption isotherms of GO (100 mesh) by rapid freeze-drying.

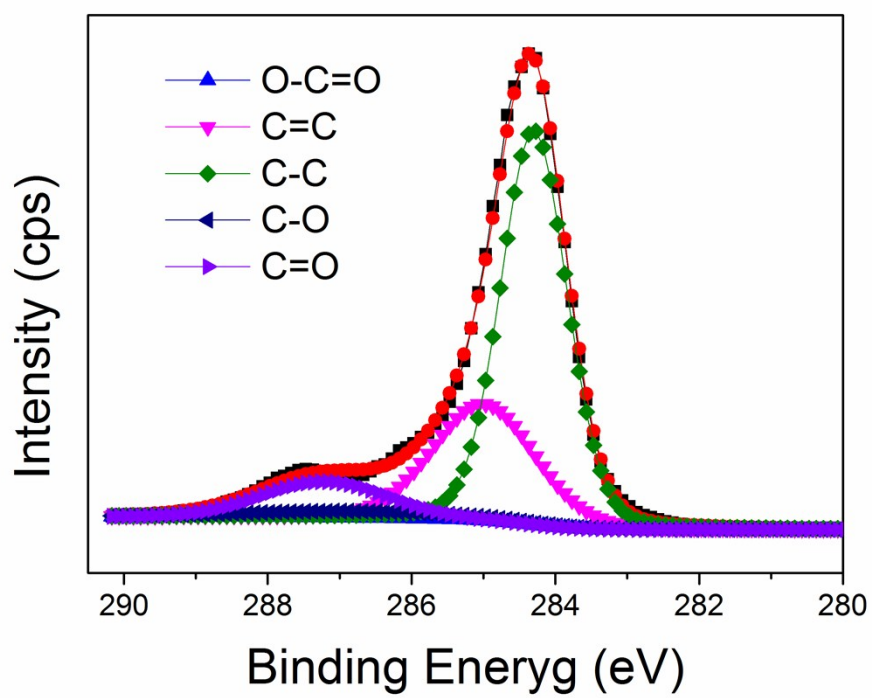

Fig. S2 XPS spectra of C1s in GO (100 mesh) after 1500 cycles.
